# Supplementary material for: Dithiothreitol causes toxicity in C. elegans by modulating the methionine–homocysteine cycle
Source: eLife. 2022 Apr 19;11:e76021. doi: 10.7554/eLife.76021 (PMC9090326; doi:10.7554/eLife.76021)
Supplement: Figure 1—figure supplement 1—source data 1. [file elife-76021-fig1-figsupp1-data1.xlsx]

## Sheet: B
DTT concentration	L1/L2			Mean	SD		L3			Mean	SD		L4			Mean	SD		Adult			Mean	SD
0 mM	0	0	0	0	0		0	0	0	0	0		0.012	0.01	0.02	0.014	0.0052915		0.988	0.99	0.98	0.986	0.0052915
2.5 mM	0	0	0.061	0.0203333	0.0352184		0.316	0.111	0.244	0.223667	0.104002		0.632	0.778	0.61	0.673333	0.091309		0.053	0.111	0.085	0.083	0.0290517
5 mM	0.955	0.9	0.947	0.934	0.0297153		0.045	0.1	0.053	0.066	0.0297153		0	0	0	0	0		0	0	0	0	0
7.5 mM	1	1	1	1	0		0	0	0	0	0		0	0	0	0	0		0	0	0	0	0
10 mM	1	1	1	1	0		0	0	0	0	0		0	0	0	0	0		0	0	0	0	0

## Sheet: C
DTT concentration	L1/L2			Mean	SD		L3			Mean	SD		L4			Mean	SD		Adult			Mean	SD
0 mM	0	0	0	0	0		0	0	0	0	0		0	0	0	0	0		1	1	1	1	0
2.5 mM	0	0	0	0	0		0.091	0	0	0.0303333	0.0525389		0.182	0.048	0.111	0.113667	0.0670398		0.727	0.952	0.889	0.856	0.116073
5 mM	0	0	0	0	0		0.455	0	0.111	0.188667	0.237235		0.455	0.5	0.556	0.503667	0.0505997		0.091	0.5	0.333	0.308	0.205643
7.5 mM	1	0.6	0.2	0.6	0.4		0	0.3	0.6	0.3	0.3		0	0.1	0.2	0.1	0.1		0	0	0	0	0
10 mM	1	0.737	0.723	0.82	0.156042		0	0.211	0.222	0.144333	0.125117		0	0.053	0.056	0.0363333	0.0315013		0	0	0	0	0

## Sheet: D
DTT concentration	L1/L2			Mean	SD		L3			Mean	SD		L4			Mean	SD		Adult			Mean	SD
0 mM	0	0	0	0	0		0	0	0	0	0		0	0	0	0	0		1	1	1	1	0
2.5 mM	0	0	0	0	0		0.04	0	0.017	0.019	0.0200749		0.08	0	0.026	0.0353333	0.0408085		0.88	1	0.957	0.945667	0.0607975
5 mM	0	0	0	0	0		0	0	0	0	0		0.038	0.018	0.091	0.049	0.0377227		0.962	0.982	0.909	0.951	0.0377227
7.5 mM	0.925	0.222	0.2	0.449	0.412375		0.05	0.444	0.2	0.231333	0.19886		0.025	0.222	0.4	0.215667	0.18758		0	0.111	0.2	0.103667	0.100201
10 mM	1	1	1	1	0		0	0	0	0	0		0	0	0	0	0		0	0	0	0	0
