# Supplementary material for: Dithiothreitol causes toxicity in C. elegans by modulating the methionine–homocysteine cycle
Source: eLife. 2022 Apr 19;11:e76021. doi: 10.7554/eLife.76021 (PMC9090326; doi:10.7554/eLife.76021)
Supplement: Figure 1—source data 1. [file elife-76021-fig1-data1.xlsx]

## Sheet: 1B
DTT concentration	L1/L2			Mean	SD		L3			Mean	SD		L4			Mean	SD		Adult			Mean	SD
0 mM	0	0	0	0	0		0	0	0	0	0		0.012	0.01	0.02	0.014	0.0052915		0.988	0.99	0.98	0.986	0.0052915
2.5 mM	0	0	0.061	0.0203333	0.0352184		0.316	0.111	0.244	0.223667	0.104002		0.632	0.778	0.61	0.673333	0.091309		0.053	0.111	0.085	0.083	0.0290517
5 mM	0.955	0.9	0.947	0.934	0.0297153		0.045	0.1	0.053	0.066	0.0297153		0	0	0	0	0		0	0	0	0	0
7.5 mM	1	1	1	1	0		0	0	0	0	0		0	0	0	0	0		0	0	0	0	0
10 mM	1	1	1	1	0		0	0	0	0	0		0	0	0	0	0		0	0	0	0	0

## Sheet: 1C
DTT concentration	L1/L2			Mean	SD		L3			Mean	SD		L4			Mean	SD		Adult			Mean	SD
0 mM	0	0	0	0	0		0	0	0	0	0		0	0	0.027	0.009	0.0155885		1	1	0.973	0.991	0.0155885
2.5 mM	0	0	0.009	0.003	0.00519615		0.008	0	0	0.00266667	0.0046188		0.015	0	0.051	0.022	0.0262107		0.977	1	0.94	0.972333	0.030271
5 mM	0	0	0	0	0		0	0	0.048	0.016	0.0277128		0.12	0.2	0.476	0.265333	0.186776		0.88	0.8	0.476	0.718667	0.213928
7.5 mM	0.755	0.85	0.855	0.82	0.0563471		0.142	0.1	0.103	0.115	0.0234307		0.094	0.05	0.043	0.0623333	0.0276466		0.009	0	0	0.003	0.00519615
10 mM	1	1	0.989	0.996333	0.00635085		0	0	0.011	0.00366667	0.00635085		0	0	0	0	0		0	0	0	0	0

## Sheet: 1E
	Fraction L4/adult
	No DTT			Mean	SD		10 mM DTT			Mean	SD
OP50	1	1	1	1	0		0	0	0	0	0
DA1877	1	1	1	1	0		1	1	1	1	0
gacA PA14	1	1	1	1	0		1	1	1	1	0
