# Supplementary material for: Dithiothreitol causes toxicity in C. elegans by modulating the methionine–homocysteine cycle
Source: eLife. 2022 Apr 19;11:e76021. doi: 10.7554/eLife.76021 (PMC9090326; doi:10.7554/eLife.76021)
Supplement: Figure 2—figure supplement 1—source data 1. [file elife-76021-fig2-figsupp1-data1.xlsx]

## Sheet: B
		Fraction L4/adult
		10 mM DTT 120 h	10 mM DTT 72 h -> vit B12 48 h
		0	0.956
		0	0.901
		0	1
	Mean	0	0.952333
	SD	0	0.0496017
