# Supplementary material for: Dithiothreitol causes toxicity in C. elegans by modulating the methionine–homocysteine cycle
Source: eLife. 2022 Apr 19;11:e76021. doi: 10.7554/eLife.76021 (PMC9090326; doi:10.7554/eLife.76021)
Supplement: Figure 2—source data 1. [file elife-76021-fig2-data1.xlsx]

## Sheet: 2B
		Fraction L4/adult
		0 mM DTT	10 mM DTT	10 mM DTT + B12
		0.99	0	0.971
		1	0	1
		0.979	0	1
	Mean	0.9897	0	0.9903
	SD	0.0105	0	0.01674

## Sheet: 2D
DTT concentration	metr-1(ok521)			Mean	SD		mmcm-1(ok1637)			Mean	SD
0 mM DTT	1	1	1	1	0		1	1	1	1	0
10 mM DTT	0	0	0	0	0		0	0	0	0	0
10 mM DTT + B12	0	0	0	0	0		0.8	0.727	0.87	0.799	0.0715052

## Sheet: 2F
Diet	DTT concentration	metr-1(ok521)			Mean	SD		mmcm-1(ok1637)			Mean	SD
DA1877	0 mM DTT	1	1	1	1	0		1	1	1	1	0
DA1877	10 mM DTT	0	0	0	0	0		1	0.95	1	0.983333	0.0288675
PA14	0 mM DTT	0.785	0.636	0.778	0.733	0.0840773		1	1	1	1	0
PA14	10 mM DTT	0	0	0	0	0		1	0.75	0.857	0.869	0.125431
