# Supplementary material for: Dithiothreitol causes toxicity in C. elegans by modulating the methionine–homocysteine cycle
Source: eLife. 2022 Apr 19;11:e76021. doi: 10.7554/eLife.76021 (PMC9090326; doi:10.7554/eLife.76021)
Supplement: Figure 3—figure supplement 2—source data 1. [file elife-76021-fig3-figsupp2-data1.xlsx]

## Sheet: SNPs frequency
Mutant name	JSJ7							JSJ8							JSJ9
Chromosome	I	II	III	IV	V	X		I	II	III	IV	V	X		I	II	III	IV	V	X
Location(Mb)
1	3	2	1	1	10	0		2	0	6	3	7	0		1	0	5	3	0	2
2	0	2	1	3	9	0		2	3	1	0	3	4		6	5	4	5	0	6
3	0	1	3	1	5	0		2	1	2	2	12	1		3	2	1	4	3	4
4	0	2	1	3	5	1		2	1	1	0	3	2		1	2	1	2	6	2
5	5	2	0	1	8	5		1	1	1	1	0	3		2	14	0	3	4	9
6	0	0	3	0	9	0		0	0	0	0	0	3		0	0	1	1	0	0
7	0	0	0	3	13	3		1	0	0	4	8	0		0	0	0	3	12	2
8	0	4	8	0	8	0		0	0	4	1	1	0		0	1	7	1	3	1
9	0	0	1	2	2	1		0	1	0	0	0	0		0	0	2	3	1	4
10	1	1	0	0	0	2		1	1	1	0	2	0		1	0	1	0	0	1
11	3	1	2	1	0	2		15	0	1	3	3	2		2	0	0	0	5	1
12	0	0	1	1	0	0		0	2	1	3	1	4		2	0	1	5	0	2
13	0	4	1	1	3	4		1	4	0	2	0	0		2	2	3	1	0	0
14	1	8	1	0	1	4		9	4	8	0	2	1		4	8	9	0	2	0
15	5	3		1	2	0		2			1	3	0		1	1		0	5	4
16				1	0	3					3	0	7					1	2	6
17				1	0	1					2	0	2					3	1	0
18					3	1						0	8						3	2
19					0							0							5
20					1							4							3
21												1							3
22
Mutant name	JSJ10							JSJ11							JSJ12
Chromosome	I	II	III	IV	V	X		I	II	III	IV	V	X		I	II	III	IV	V	X
Location(Mb)
1	1	5	1	2	0	4		1	0	1	0	0	0		2	3	3	1	0	0
2	1	0	1	0	1	4		0	0	3	0	1	0		0	3	1	0	1	2
3	0	4	1	1	0	0		0	0	3	0	2	1		1	0	1	1	1	3
4	6	9	1	1	3	0		0	0	0	2	3	1		1	2	1	1	3	3
5	0	1	0	0	3	4		4	7	0	1	2	9		1	1	0	0	5	0
6	1	1	1	0	0	1		0	0	4	0	3	1		0	1	2	0	2	2
7	0	0	0	1	6	1		0	4	1	0	9	1		0	0	0	6	10	0
8	0	0	2	1	1	2		0	0	4	3	2	1		0	0	4	0	0	1
9	1	1	0	3	2	2		1	0	0	2	1	1		0	0	0	2	0	2
10	4	1	0	0	0	1		1	1	0	1	2	1		2	1	0	1	5	0
11	2	0	2	0	3	0		2	1	2	0	0	1		2	2	0	0	1	1
12	2	1	0	0	0	1		1	0	2	0	0	3		0	2	3	2	0	4
13	1	0	2	0	1	2		1	3	3	3	0	1		1	3	1	3	0	0
14	3	2	1	0	6	0		4	1	0	0	0	1		4	3	12	0	0	0
15	1	1		0	3	1		1			0	14	1		4			2	0	5
16				3	0	6					4	0	7					0	0	5
17				1	0	0					2	4	3					7	1	1
18					1	3						1	2					1	2	1
19					2							1							4
20					0							4							0
21					3							1							1
22
Mutant name	JSJ1							JSJ2							JSJ3
Chromosome	I	II	III	IV	V	X		I	II	III	IV	V	X		I	II	III	IV	V	X
Location(Mb)
1	0	2	4	1	4	1		0	0	1	0	0	0		0	0	3	0	2	0
2	1	5	2	0	0	1		0	2	1	0	2	1		3	1	0	0	0	2
3	1	1	1	0	5	0		2	0	2	1	1	0		2	2	0	1	3	1
4	0	0	0	0	6	1		1	1	2	0	2	1		0	0	0	2	11	1
5	1	0	0	3	5	8		0	0	0	2	0	0		1	1	0	1	3	5
6	0	0	0	1	9	1		1	0	0	0	0	1		0	0	0	0	1	1
7	1	0	0	2	8	3		0	0	0	2	3	1		0	0	1	9	7	2
8	0	2	5	0	7	0		1	0	3	0	1	1		1	2	11	0	5	1
9	0	0	0	0	0	1		0	0	0	0	0	0		1	1	0	0	3	1
10	0	2	0	0	1	1		0	3	0	1	2	0		1	4	0	1	7	1
11	2	0	0	0	1	1		1	0	0	0	3	1		2	2	0	0	3	0
12	0	2	3	0	0	2		0	0	1	1	5	1		1	0	4	3	3	0
13	0	10	4	3	0	0		1	2	1	2	1	0		0	0	0	0	1	0
14	1	2	3	0	1	0		0	2	1	1	3	1		6	2	3	3	5	1
15	1	0		0	2	3		1	0		1	1	3		4	2		0	3	5
16		1		1	0	2					2	4	3					5	0	2
17				0	0							2	3					1	1	8
18				1	1							5	4					1	0	1
19												2							0
20												1							0
21																			2
22
Mutant name	JSJ4							JSJ5							JSJ6
Chromosome	I	II	III	IV	V	X		I	II	III	IV	V	X		I	II	III	IV	V	X
Location(Mb)
1	1	0	0	1	1	1		1	8	1	1	0	3		3	1	0	0	7	1
2	2	2	2	1	2	0		3	1	1	0	0	3		1	0	3	0	5	0
3	6	1	3	2	5	6		0	3	2	0	2	1		1	1	0	0	9	0
4	1	0	0	0	4	1		0	2	1	0	4	2		1	0	0	0	6	0
5	0	2	0	1	3	3		1	4	0	1	1	4		0	4	0	1	3	5
6	0	1	0	0	4	0		0	1	0	0	5	1		0	0	1	1	2	0
7	0	0	0	4	9	0		0	0	0	1	5	1			0	0	1	9	0
8	0	0	4	2	4	0		0	1	3	0	0	0			0	3	1	3	0
9	0	0	1	0	3	3		0	2	0	0	5	0			0	0	4	2	0
10	2	2	2	0	0	1		1	8	0	0	4	0			1	0	0	2	0
11	0	0	0	1	4	0		2	0	0	2	1	3			1	0	0	4	0
12	1	0	1	0	12	0		0	0	1	2	3	0			0	3	0	3	0
13	1	2	0	3	5	0		0	0	0	0	2	0			0	0	0	0	0
14	1	0		0	3	0		2	0	5	0	4	0			4	0	1	3	0
15				0	0	1		1	0	0	0	1	3			0			3	2
16				1	0	1		0	1	0	1		7			3			0	7
17				1	0	0		0	0		1		0						0	0
18				1	0	4			0		0		1						1	1
19					0	0							0						0	0
20					3														4	4
21																			1	1
22
