# Supplementary material for: Dithiothreitol causes toxicity in C. elegans by modulating the methionine–homocysteine cycle
Source: eLife. 2022 Apr 19;11:e76021. doi: 10.7554/eLife.76021 (PMC9090326; doi:10.7554/eLife.76021)
Supplement: Figure 3—figure supplement 3—source data 1. [file elife-76021-fig3-figsupp3-data1.xlsx]

## Sheet: B
RNAi	L1/L2			Mean	SD		L3			Mean	SD		L4			Mean	SD		Adult			Mean	SD
EV	0.58	0.423	0.565	0.522667	0.0866391		0.223	0.35	0.261	0.278	0.0651844		0.196	0.21	0.174	0.193333	0.0181475		0	0.021	0	0.007	0.0121244
rips-1	0	0	0	0	0		0.05	0.04	0.074	0.0546667	0.0174738		0.3	0.16	0.111	0.190333	0.0980833		0.65	0.8	0.815	0.755	0.0912414
R08E5.1	0	0	0	0	0		0.043	0.071	0.103	0.0723333	0.0300222		0.348	0.214	0.276	0.279333	0.0670622		0.609	0.714	0.621	0.648	0.0574717
R08F11.4	0.182	0.085	0.2	0.155667	0.0618574		0.364	0.211	0.32	0.298333	0.0787676		0.455	0.563	0.48	0.499333	0.0565361		0	0.141	0	0.047	0.0814064
K12D9.1	0.1	0.107	0.095	0.100667	0.00602771		0.15	0.179	0.238	0.189	0.0448442		0.6	0.357	0.571	0.509333	0.132719		0.15	0.357	0.095	0.200667	0.138153

## Sheet: C
DTT concentration	jsnEx1 progeny	L1/L2			Mean	SD		L3			Mean	SD		L4			Mean	SD		Adult			Mean	SD
0 mM	Non-transgenic	0	0	0	0	0		0	0	0	0	0		0	0	0	0	0		1	1	1	1	0
0 mM	Transgenic	0	0	0	0	0		0.082	0.071	0.109	0.0873333	0.0195533		0.102	0.125	0.13	0.119	0.0149332		0.816	0.804	0.761	0.793667	0.0289194
2.5 mM	Non-transgenic	0	0.119	0.077	0.0653333	0.0603517		0.375	0.238	0.288	0.300333	0.0693277		0.375	0.476	0.481	0.444	0.059808		0.25	0.167	0.154	0.190333	0.0520801
2.5 mM	Transgenic	0.371	0.532	0.76	0.554333	0.195459		0.556	0.426	0.217	0.399667	0.171027		0.074	0.043	0.022	0.0463333	0.0261598		0	0	0	0	0
5 mM	Non-transgenic	0.811	0.682	0.778	0.757	0.0670149		0.189	0.227	0.156	0.190667	0.0355293		0	0.091	0.067	0.0526667	0.0471628		0	0	0	0	0
5 mM	Transgenic	1	1	1	1	0		0	0	0	0	0		0	0	0	0	0		0	0	0	0	0
