# Supplementary material for: Dithiothreitol causes toxicity in C. elegans by modulating the methionine–homocysteine cycle
Source: eLife. 2022 Apr 19;11:e76021. doi: 10.7554/eLife.76021 (PMC9090326; doi:10.7554/eLife.76021)
Supplement: Figure 3—figure supplement 4—source data 1. [file elife-76021-fig3-figsupp4-data1.xlsx]

## Sheet: B
		hsp-6p::GFP
		Fluorescence intensity
		Control	10 mM DTT	10 mM DTT + vit B12
		68.1186	113.799	44.7896
		65.7984	179.779	46.3909
		62.1066	109.957	49.5877
		50.4682	143.842	109.701
		48.6052	125.166	62.4402
		59.7516	170.553	28.8745
		56.077	117.099	45.7753
		46.1259	223.631	58.4696
		48.6919	110.629	59.2017
		53.087	170.67	53.7985
		42.2391	104.153	41.0953
		55.0569	93.5914	66.6362
		37.5725	127.755	72.0462
		51.3288	144.598	42.1406
		51.1444	112.828	40.7326
			129.794	31.3698
	Mean	53.08	136.1	53.32
	SD	8.393	34.52	19.24
