# Supplementary material for: Dithiothreitol causes toxicity in C. elegans by modulating the methionine–homocysteine cycle
Source: eLife. 2022 Apr 19;11:e76021. doi: 10.7554/eLife.76021 (PMC9090326; doi:10.7554/eLife.76021)
Supplement: Figure 3—source data 1. [file elife-76021-fig3-data1.xlsx]

## Sheet: 3D
		Fraction L4/adult
		0 mM DTT		10 mM DTT
		N2	rips-1(gk231506)	N2	rips-1(gk231506)
		1	1	0	0.921
		1	1	0	0.964
		1	1	0	0.923
	Mean	1	1	0	0.936
	SD	0	0	0	0.02427

## Sheet: 3E
		Fraction L4/adult
		rips-1(jsn11)	rips-1(jsn11); jsnEx1	rips-1(jsn11); jsnEx2
		1	0	0
		1	0	0
		0.943	0	0
	Mean	0.981	0	0
	SD	0.03291	0	0

## Sheet: 3G
	Gene	0 mM DTT			Mean	SD		10 mM DTT			Mean	SD
	rips-1	1	1	1	1	0		18.7654	14.9285	20.1122	17.9354	2.68967
	R08E5.1	1	1	1	1	0		12.042	12.996	15.0324	13.3568	1.52749
	R08F11.4	1	1	1	1	0		5.61778	3.34035	4.08405	4.34739	1.16133
	K12D9.1	1	1	1	1	0		1.32869	0.687771	0.768438	0.928298	0.349084

## Sheet: 3I
		rips-1p::GFP
		Fluorescence intensity
		Control	10 mM DTT
		45.2699	372.123
		81.458	396.112
		64.5211	435.483
		100.02	335.456
		80.9504	333.724
		57.7574	332.873
		77.4552	357.796
		86.1791	522.967
		68.937	458.55
		88.8092	385.781
		120.952	361.836
		68.425	431.38
		79.61	478.438
		53.5364	360.97
	Mean	76.71	397.4
	SD	19.51	59.27
