# Supplementary material for: Dithiothreitol causes toxicity in C. elegans by modulating the methionine–homocysteine cycle
Source: eLife. 2022 Apr 19;11:e76021. doi: 10.7554/eLife.76021 (PMC9090326; doi:10.7554/eLife.76021)
Supplement: Figure 4—source data 1. [file elife-76021-fig4-data1.xlsx]

## Sheet: 4B
Condition	Strain	L1/L2			Mean	SD		L3			Mean	SD		L4			Mean	SD		Adult			Mean	SD
control	N2	0	0	0	0	0		0	0	0	0	0		0.017	0	0.035	0.0173333	0.0175024		0.983	1	0.965	0.982667	0.0175024
control	rips-1(jsn11)	0	0	0	0	0		0	0	0	0	0		0.01	0.027	0.008	0.015	0.0104403		0.99	0.973	0.992	0.985	0.0104403
1 mM β-ME	N2	0	0	0	0	0		0	0	0	0	0		0.2	0.06	0.099	0.119667	0.0722519		0.8	0.94	0.901	0.880333	0.0722519
1 mM β-ME	rips-1(jsn11)	0	0	0	0	0		0	0	0	0	0		0	0	0	0	0		1	1	1	1	0
2 mM β-ME	N2	0.1	0.074	0.037	0.0703333	0.0316596		0.8	0.741	0.815	0.785333	0.0391195		0.1	0.185	0.148	0.144333	0.0426185		0	0	0	0	0
2 mM β-ME	rips-1(jsn11)	0	0	0	0	0		0	0	0	0	0		0	0	0	0	0		1	1	1	1	0
10 mM NAC	N2	0	0	0	0	0		0	0	0	0	0		0	0	0.024	0.008	0.0138564		1	1	0.976	0.992	0.0138564
10 mM NAC	rips-1(jsn11)	0	0	0	0	0		0	0	0	0	0		0	0	0	0	0		1	1	1	1	0
20 mM NAC	N2	1	1	1	1	0		0	0	0	0	0		0	0	0	0	0		0	0	0	0	0
20 mM NAC	rips-1(jsn11)	1	1	1	1	0		0	0	0	0	0		0	0	0	0	0		0	0	0	0	0

## Sheet: 4D
		rips-1p::GFP
		Fluorescence intensity
		Control	2 mM β-ME	20 mM NAC
		90.2787	488.412	76.4802
		62.1748	520.896	78.488
		98.3861	400.713	81.9829
		55.51	598.759	78.2037
		50.7227	504.094	103.003
		65.4363	529.453	107.374
		41.2347	516.72	79.3207
		72.1805	442.819	74.2867
		78.5747	487.144	78.5522
		72.4914	515.172	120.611
		145.21	507.53	66.102
		49.7218	349.56	195.268
		191.991	515.551	89.9453
		113.036	404.863	102.305
		74.0883	447.05	43.8927
		87.776	509.75	74.4909
	Mean	84.3	483.7	90.64
	SD	38.86	60.89	33.25

## Sheet: 4F
		L1/L2			Mean	SD		L3			Mean	SD		L4			Mean	SD		Adult			Mean	SD
	Control	0	0	0	0	0		0	0	0	0	0		0	0	0	0	0		1	1	1	1	0
	2 mM β-ME	0.045	0.095	0.115	0.085	0.0360555		0.909	0.762	0.769	0.813333	0.0829237		0.045	0.143	0.115	0.101	0.0504777		0	0	0	0	0
	2 mM β-ME + vit B12	0	0	0	0	0		0	0	0	0	0		0	0	0.01	0.00333333	0.0057735		1	1	0.99	0.996667	0.0057735
	20 mM NAC	1	1	1	1	0		0	0	0	0	0		0	0	0	0	0		0	0	0	0	0
	20 mM NAC + vit B12	1	1	1	1	0		0	0	0	0	0		0	0	0	0	0		0	0	0	0	0
