# Supplementary material for: Dithiothreitol causes toxicity in C. elegans by modulating the methionine–homocysteine cycle
Source: eLife. 2022 Apr 19;11:e76021. doi: 10.7554/eLife.76021 (PMC9090326; doi:10.7554/eLife.76021)
Supplement: Figure 5—source data 1. [file elife-76021-fig5-data1.xlsx]

## Sheet: 5B
	L1/L2			Mean	SD		L3			Mean	SD		L4			Mean	SD		Adult			Mean	SD
10 mM DTT	1	1	1	1	0		0	0	0	0	0		0	0	0	0	0		0	0	0	0	0
10 mM DTT + 10 mM Met	0.028	0.058	0	0.0286667	0.0290057		0.278	0.29	0.176	0.248	0.0626418		0.486	0.58	0.706	0.590667	0.110387		0.208	0.072	0.118	0.132667	0.0691761
10 mM DTT + 25 mM Met	0.024	0	0	0.008	0.0138564		0	0	0	0	0		0.122	0.138	0.091	0.117	0.0238956		0.854	0.862	0.909	0.875	0.0297153

## Sheet: 5C
	L1/L2			Mean	SD		L3			Mean	SD		L4			Mean	SD		Adult			Mean	SD
10 mM DTT	1	1	1	1	0		0	0	0	0	0		0	0	0	0	0		0	0	0	0	0
10 mM DTT + 10 mM Met	0.299	0.077	0.103	0.159667	0.121364		0.149	0.231	0.299	0.226333	0.0751088		0.522	0.615	0.513	0.55	0.0564712		0.03	0.077	0.085	0.064	0.0297153
10 mM DTT + 25 mM Met	0.071	0	0	0.0236667	0.0409919		0.071	0.035	0	0.0353333	0.0355012		0.357	0.151	0.111	0.206333	0.132005		0.5	0.814	0.889	0.734333	0.206374

## Sheet: 5E
		Fraction L4/adult
		0 mM DTT	10 mM DTT	10 mM DTT + 25 mM Met	10 mM DTT + vit B12
		0.875	0	0	0
		1	0	0	0
		1	0	0	0
	Mean	0.9583	0	0	0
	SD	0.07217	0	0	0

## Sheet: 5F
		SAM levels
		N2			rips-1(jsn11)
		0 mM DTT	10 mM DTT		0 mM DTT	10 mM DTT
		1	0.756		1.19	1.568
		1	0.606		0.669	1.15
		1	0.642		0.94	1.505
	Mean	1	0.668		0.933	1.408
	SD	0	0.07831		0.2606	0.2254

## Sheet: 5H
Strain	DTT concentration	L1/L2			Mean	SD		L3			Mean	SD		L4			Mean	SD		Adult			Mean	SD
N2	10 mM DTT	1	1	1	1	0		0	0	0	0	0		0	0	0	0	0		0	0	0	0	0
N2	10 mM DTT + Choline	0	0.05	0.067	0.039	0.0348281		0.027	0.05	0.029	0.0353333	0.012741		0.072	0.2	0.143	0.138333	0.0641275		0.901	0.7	0.762	0.787667	0.102929
metr-1(ok521)	10 mM DTT	1	1	1	1	0		0	0	0	0	0		0	0	0	0	0		0	0	0	0	0
metr-1(ok521)	10 mM DTT + Choline	0	0.058	0.053	0.037	0.0321403		0.04	0.029	0.053	0.0406667	0.0120139		0.069	0.144	0.158	0.123667	0.0478574		0.891	0.769	0.737	0.799	0.081265
sams-1(ok2946)	10 mM DTT	1	1	1	1	0		0	0	0	0	0		0	0	0	0	0		0	0	0	0	0
sams-1(ok2946)	10 mM DTT + Choline	0.581	0.616	0.589	0.595333	0.0183394		0.302	0.274	0.235	0.270333	0.0336502		0.116	0.11	0.176	0.134	0.0364966		0	0	0	0	0
