# Supplementary material for: Dithiothreitol causes toxicity in C. elegans by modulating the methionine–homocysteine cycle
Source: eLife. 2022 Apr 19;11:e76021. doi: 10.7554/eLife.76021 (PMC9090326; doi:10.7554/eLife.76021)
Supplement: Figure 6—figure supplement 1—source data 1. [file elife-76021-fig6-figsupp1-data1.xlsx]

## Sheet: B
		hsp-4p::GFP
		Fluorescence intensity
		Control	5 mM DTT	10 mM DTT
		17.711	19.9058	61.1922
		14.2037	48	67.8236
		14.8914	49.528	50.7173
		22.9122	33.1307	70.8287
		21.313	49.6043	88.5218
		21.8276	44.8237	92.5245
		13.284	52.9775	55.6552
		12.5905	21.3125	67.0596
		11.6247	10.1043	43.6551
		21.3988	7.22124	30.0281
		32.0468	18.3019	101.911
		23.1368	19.4727	83.8257
		17.0188	18.9375	71.3622
		12.8243	44.9966	73.7521
		10.8194	35.0857	84.6993
		15.5498	34.4044	49.9004
	Mean	17.7	31.74	68.34
	SD	5.687	15.34	19.34

## Sheet: D
	L1/L2			Mean	SD		L3			Mean	SD		L4			Mean	SD		Adult			Mean	SD
0 mM DTT	0	0	0	0	0		0	0	0	0	0		0.027	0	0	0.009	0.0155885		0.973	1	1	0.991	0.0155885
5 mM DTT	0.571	0.737	0.732	0.68	0.0944299		0.381	0.105	0.244	0.243333	0.138001		0.048	0.158	0.024	0.0766667	0.0714516		0	0	0	0	0
5 mM DTT + vit B12	0	0	0	0	0		0	0	0	0	0		0	0	0	0	0		1	1	1	1	0
10 mM DTT	1	1	1	1	0		0	0	0	0	0		0	0	0	0	0		0	0	0	0	0
10 mM DTT + vit B12	0	0	0	0	0		0.019	0	0.028	0.0156667	0.0142945		0.047	0	0.046	0.031	0.0268514		0.935	1	0.926	0.953667	0.0403774

## Sheet: E
	L1/L2			Mean	SD		L3			Mean	SD		L4			Mean	SD		Adult			Mean	SD
0 mM DTT	0	0	0	0	0		0	0	0	0	0		0	0.032	0	0.0106667	0.0184752		1	0.968	1	0.989333	0.0184752
5 mM DTT	0.685	0.69	0.722	0.699	0.0200749		0.274	0.172	0.206	0.217333	0.0519359		0.041	0.138	0.072	0.0836667	0.0495412		0	0	0	0	0
5 mM DTT + vit B12	0	0	0	0	0		0	0	0	0	0		0	0	0	0	0		1	1	1	1	0
10 mM DTT	1	1	1	1	0		0	0	0	0	0		0	0	0	0	0		0	0	0	0	0
10 mM DTT + vit B12	0	0	0	0	0		0	0	0.061	0.0203333	0.0352184		0.035	0.008	0.03	0.0243333	0.0143643		0.965	0.992	0.909	0.955333	0.042336

## Sheet: F
	L1/L2			Mean	SD		L3			Mean	SD		L4			Mean	SD		Adult			Mean	SD
0 mM DTT	0	0	0	0	0		0	0	0	0	0		0	0	0	0	0		1	1	1	1	0
5 mM DTT	0.612	0.824	0.632	0.689333	0.117053		0.306	0.118	0.316	0.246667	0.111541		0.082	0.059	0.053	0.0646667	0.015308		0	0	0	0	0
5 mM DTT + vit B12	0	0	0	0	0		0	0	0	0	0		0	0	0	0	0		1	1	1	1	0
10 mM DTT	1	1	1	1	0		0	0	0	0	0		0	0	0	0	0		0	0	0	0	0
10 mM DTT + vit B12	0.045	0.028	0	0.0243333	0.022723		0	0	0.028	0.00933333	0.0161658		0.063	0.046	0.028	0.0456667	0.0175024		0.893	0.926	0.943	0.920667	0.0254231
