# Supplementary material for: Dithiothreitol causes toxicity in C. elegans by modulating the methionine–homocysteine cycle
Source: eLife. 2022 Apr 19;11:e76021. doi: 10.7554/eLife.76021 (PMC9090326; doi:10.7554/eLife.76021)
Supplement: Figure 6—source data 1. [file elife-76021-fig6-data1.xlsx]

## Sheet: 6B
		hsp-4p::GFP
		Fluorescence intensity
		Control	10 mM DTT	10 mM DTT + B12	10 mM DTT + Met	10 mM DTT + Choline
		17.711	61.1922	21.3755	13.2007	19.9382
		14.2037	67.8236	15.2697	27.4773	42.1349
		14.8914	50.7173	28.5206	34.0653	17.0159
		22.9122	70.8287	13.2987	52.9689	26.2926
		21.313	88.5218	16.6866	33.9747	8.86057
		21.8276	92.5245	12.7308	21.451	15.5552
		13.284	55.6552	18.4537	35.5162	20.1302
		12.5905	67.0596	10.3068	33.8203	18.2541
		11.6247	43.6551	4.34099	31.4954	29.9989
		21.3988	30.0281	13.9912	31.765	8.68016
		32.0468	101.911	24.0988	46.875	9.39876
		23.1368	83.8257	13.7197	47.1052	23.1859
		17.0188	71.3622	20.9479	38.3206	20.1821
		12.8243	73.7521	15.0569	26.2238	5.95644
		10.8194	84.6993	22.4068	28.6331	14.2195
		15.5498	49.9004	16.4898	17.7469	10.7314
	Mean	17.7	68.34	16.73	32.54	18.16
	SD	5.687	19.34	5.842	10.59	9.304

## Sheet: 6C
DTT concentration	L1/L2			Mean	SD		L3			Mean	SD		L4			Mean	SD		Adult			Mean	SD
0 mM	0	0	0	0	0		0	0	0	0	0		0	0	0	0	0		1	1	1	1	0
0.5 mM	0.01	0	0	0.00333333	0.0057735		0	0	0	0	0		0	0	0.02	0.00666667	0.011547		0.99	1	0.98	0.99	0.01
1 mM	0.02	0	0	0.00666667	0.011547		0	0	0	0	0		0	0.043	0	0.0143333	0.0248261		0.98	0.957	1	0.979	0.0215174
2.5 mM	0	0	0	0	0		0.027	0.125	0.052	0.068	0.0509215		0.901	0.688	0.69	0.759667	0.122402		0.072	0.188	0.259	0.173	0.0943981
5 mM	0.9	0.75	0.556	0.735333	0.172468		0.1	0.25	0.333	0.227667	0.118095		0	0	0.111	0.037	0.0640859		0	0	0	0	0

## Sheet: 6D
DTT concentration	L1/L2			Mean	SD		L3			Mean	SD		L4			Mean	SD		Adult			Mean	SD
0 mM	0	0	0	0	0		0	0.039	0.022	0.0203333	0.0195533		0.059	0.052	0.089	0.0666667	0.0196554		0.941	0.909	0.889	0.913	0.0262298
0.5 mM	0.022	0	0	0.00733333	0.0127017		0	0.048	0.03	0.026	0.0242487		0	0.095	0.07	0.055	0.0492443		0.978	0.857	0.9	0.911667	0.0613379
1 mM	0	0	0.01	0.00333333	0.0057735		0.023	0.051	0.04	0.038	0.0141067		0.047	0.082	0.059	0.0626667	0.0177858		0.93	0.867	0.891	0.896	0.0317962
2.5 mM	0	0.105	0.084	0.063	0.0555608		0.08	0.211	0.158	0.149667	0.0658964		0.46	0.526	0.632	0.539333	0.0867717		0.46	0.158	0.126	0.248	0.184293
5 mM	0.843	0.941	1	0.928	0.0793032		0.12	0.059	0	0.0596667	0.0600028		0.036	0	0	0.012	0.0207846		0	0	0	0	0

## Sheet: 6E
DTT concentration	L1/L2			Mean	SD		L3			Mean	SD		L4			Mean	SD		Adult			Mean	SD
0 mM	0	0	0	0	0		0.031	0.057	0	0.0293333	0.0285365		0.051	0.049	0.029	0.043	0.0121655		0.918	0.894	0.971	0.927667	0.0393997
0.5 mM	0	0	0	0	0		0.027	0.042	0	0.023	0.0212838		0.088	0.125	0.053	0.0886667	0.0360046		0.885	0.833	0.947	0.888333	0.0570731
1 mM	0	0	0	0	0		0	0.048	0.009	0.019	0.0255147		0.095	0.286	0.137	0.172667	0.100371		0.905	0.667	0.855	0.809	0.125491
2.5 mM	0.047	0.038	0	0.0283333	0.0249466		0.472	0.481	0.25	0.401	0.130847		0.472	0.481	0.688	0.547	0.122192		0.009	0	0.063	0.024	0.0340735
5 mM	1	0.857	1	0.952333	0.0825611		0	0.143	0	0.0476667	0.0825611		0	0	0	0	0		0	0	0	0	0

## Sheet: 6F
DTT concentration	L1/L2			Mean	SD		L3			Mean	SD		L4			Mean	SD		Adult			Mean	SD
0 mM	0	0	0	0	0		0	0	0	0	0		0.02	0	0.022	0.014	0.0121655		0.98	1	0.978	0.986	0.0121655
0.5 mM	0	0	0	0	0		0.018	0	0	0.006	0.0103923		0.009	0.035	0.029	0.0243333	0.0136137		0.973	0.965	0.971	0.969667	0.00416333
1 mM	0	0	0	0	0		0	0.043	0	0.0143333	0.0248261		0.03	0.087	0.027	0.048	0.0338083		0.97	0.87	0.973	0.937667	0.0586202
2.5 mM	0	0.042	0	0.014	0.0242487		0.202	0.167	0.333	0.234	0.0875043		0.707	0.583	0.667	0.652333	0.0632877		0.091	0.208	0	0.0996667	0.10427
5 mM	1	0.857	1	0.952333	0.0825611		0	0.143	0	0.0476667	0.0825611		0	0	0	0	0		0	0	0	0	0

## Sheet: 6G
DTT concentration	L1/L2			Mean	SD		L3			Mean	SD		L4			Mean	SD		Adult			Mean	SD
0 mM	0	0	0	0	0		0	0.007	0	0.00233333	0.00404145		0	0.022	0	0.00733333	0.0127017		1	0.97	1	0.99	0.0173205
0.5 mM	0	0	0	0	0		0	0.024	0	0.008	0.0138564		0.027	0.024	0.029	0.0266667	0.00251661		0.973	0.952	0.971	0.965333	0.0115902
1 mM	0	0	0	0	0		0	0.024	0	0.008	0.0138564		0.3	0.081	0.074	0.151667	0.128508		0.7	0.894	0.926	0.84	0.122295
2.5 mM	0	0	0	0	0		0.179	0.278	0.227	0.228	0.0495076		0.714	0.648	0.727	0.696333	0.0423596		0.107	0.074	0.045	0.0753333	0.0310215
5 mM	1	0.952	0.895	0.949	0.0525642		0	0.048	0.105	0.051	0.0525642		0	0	0	0	0		0	0	0	0	0

## Sheet: 6H
	L1/L2			Mean	SD		L3			Mean	SD		L4			Mean	SD		Adult			Mean	SD
0 mM DTT	0	0	0	0	0		0	0	0	0	0		0	0	0	0	0		1	1	1	1	0
5 mM DTT	0.8	0.87	0.619	0.763	0.129526		0.2	0.13	0.309	0.213	0.0902053		0	0	0.072	0.024	0.0415692		0	0	0	0	0
5 mM DTT + vit B12	0	0	0	0	0		0	0	0	0	0		0.1	0	0	0.0333333	0.057735		0.9	1	1	0.966667	0.057735
10 mM DTT	1	1	1	1	0		0	0	0	0	0		0	0	0	0	0		0	0	0	0	0
10 mM DTT + vit B12	0	0	0	0	0		0.028	0.039	0.019	0.0286667	0.0100167		0.055	0.078	0.056	0.063	0.013		0.917	0.882	0.926	0.908333	0.0232451

## Sheet: 6I
	L1/L2			Mean	SD		L3			Mean	SD		L4			Mean	SD		Adult			Mean	SD
0 mM DTT	0	0	0	0	0		0.035	0	0	0.0116667	0.0202073		0.088	0	0.059	0.049	0.0448442		0.877	1	0.941	0.939333	0.0615169
5 mM DTT	0.744	0.909	0.834	0.829	0.0826136		0.213	0.091	0.128	0.144	0.062554		0.043	0	0.038	0.027	0.023516		0	0	0	0	0
5 mM DTT + vit B12	0	0	0	0	0		0.05	0.027	0.05	0.0423333	0.0132791		0.05	0.088	0.05	0.0626667	0.0219393		0.9	0.885	0.9	0.895	0.00866025
10 mM DTT	1	1	1	1	0		0	0	0	0	0		0	0	0	0	0		0	0	0	0	0
10 mM DTT + vit B12	1	1	0.944	0.981333	0.0323316		0	0	0.042	0.014	0.0242487		0	0	0.014	0.00466667	0.0080829		0	0	0	0	0

## Sheet: 6J
	L1/L2			Mean	SD		L3			Mean	SD		L4			Mean	SD		Adult			Mean	SD
0 mM DTT	0	0	0	0	0		0	0	0	0	0		0	0	0.02	0.00666667	0.011547		1	1	0.98	0.993333	0.011547
5 mM DTT	0.952	0.952	0.926	0.943333	0.0150111		0.048	0.048	0.074	0.0566667	0.0150111		0	0	0	0	0		0	0	0	0	0
5 mM DTT + vit B12	0	0	0	0	0		0	0	0	0	0		0	0	0.024	0.008	0.0138564		1	1	0.976	0.992	0.0138564
10 mM DTT	1	1	1	1	0		0	0	0	0	0		0	0	0	0	0		0	0	0	0	0
10 mM DTT + vit B12	0.93	0.693	0.963	0.862	0.147285		0	0.099	0.037	0.0453333	0.0500233		0.058	0.198	0	0.0853333	0.101791		0.012	0.01	0	0.00733333	0.0064291
